# Supplementary material
Source: publisher site journal article supplement (https://www.dovepress.com/article/223021)

**Supplementary Figure**

Histological features of LSCC. The diagnostic criteria include (A) morphological features of LSCC in hematoxylin and eosin-stained tissue sections; (B) cytokeratin 5/6-positive immunohistochemistry; and (C) ΔNP63 (p40)-positive immunohistochemistry.


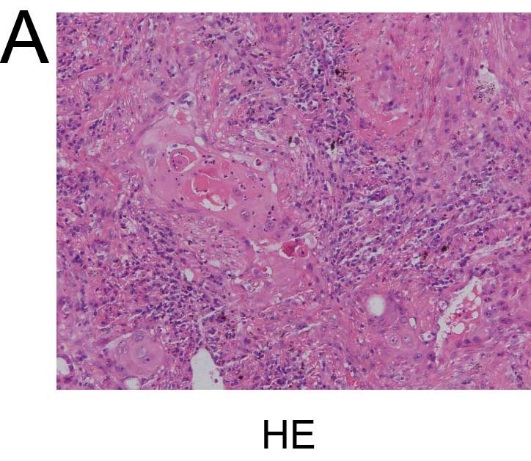

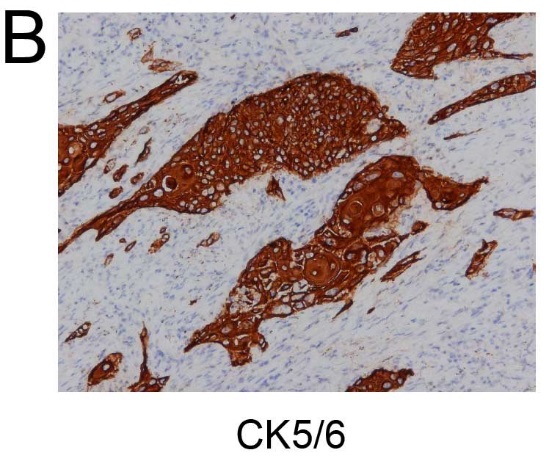


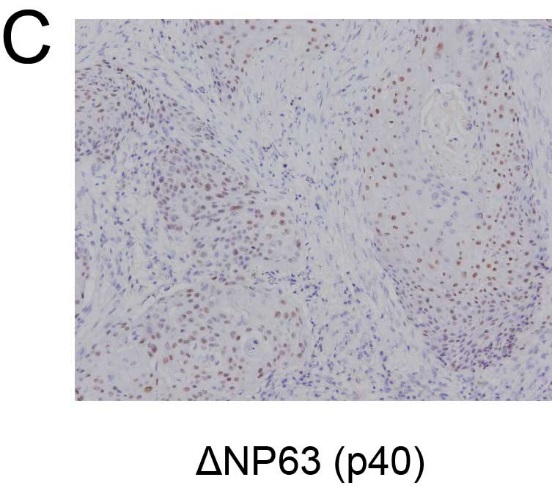

Supplement: Supplementary file 1 [file get_supplementary_file.php]
